# Supplementary material
Source: PubMed Central journal article supplement (PMC2862638)
Supplement: NIHMS186996-supplement-1_si_001.pdf [file NIHMS186996-supplement-1_si_001.pdf]

# High Relaxivity Trimetallic Nitride (Gd<sub>3</sub>N) Metallofullerene MRI Contrast Agents with Optimized Functionality

Jianfei Zhang<sup>†</sup>, Chunying Shu<sup>†</sup>, Jonathan Reid<sup>†</sup>, Lesley Shantell Owens<sup>†</sup>, Ting Cai<sup>†</sup>, Harry W. Gibson<sup>†</sup>, Gary L. Long<sup>†</sup>, Frank D. Corwin<sup>‡</sup>, Zhi-Jian Chen<sup>§</sup>, Panos P. Fatouros<sup>‡</sup>, Harry C. Dorn<sup>\*†</sup>

<sup>†</sup> Department of Chemistry, Virginia Polytechnic Institute and State University, Blacksburg, VA, 24060

<sup>‡</sup> Department of Radiology, Virginia Commonwealth University, Richmond, VA, 23298

<sup>§</sup> Department of Neurosurgery, Virginia Commonwealth University, Richmond, VA, 23298

**Corresponding author:** Harry C. Dorn, Department of Chemistry, Virginia Polytechnic Institute and State University, Blacksburg, VA, 24060; E-Mail: [hdorn@vt.edu](mailto:hdorn@vt.edu); Phone: 540-231-5953; Fax: 540- 231-3255

**Supporting Information**

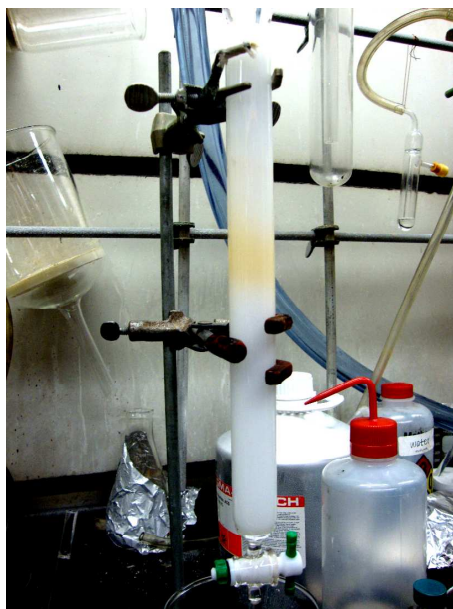

Figure 1. Picture of purifying  $Gd_3N@C_{80}[DiPEG(OH)_x]$  with Sephadex G25 size-exclusion gel column. The diameter of the column is 2.5cm and the length is 42cm. Elution time is 55 minutes.

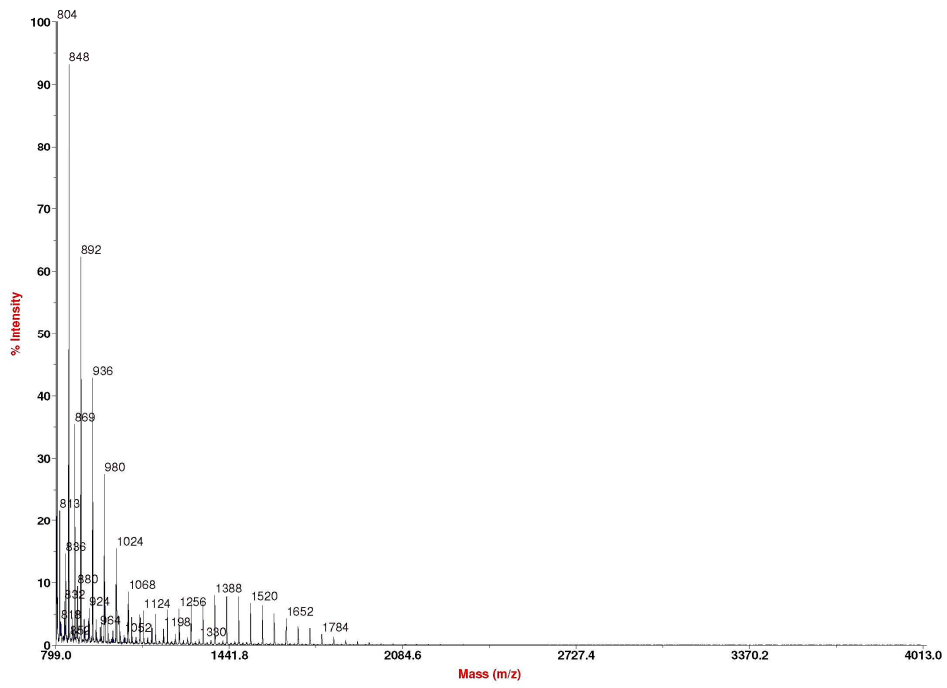

(a)

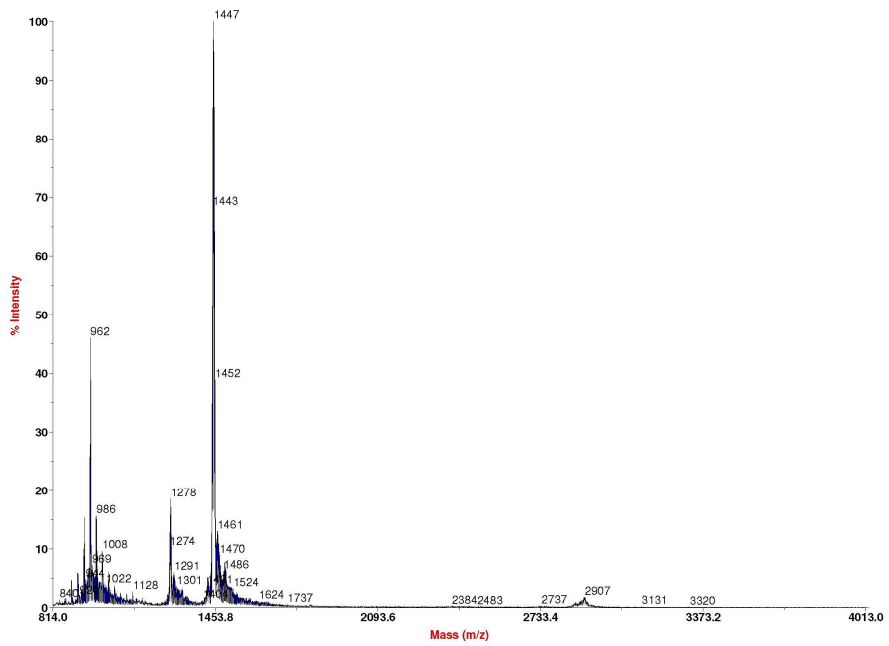

(b)

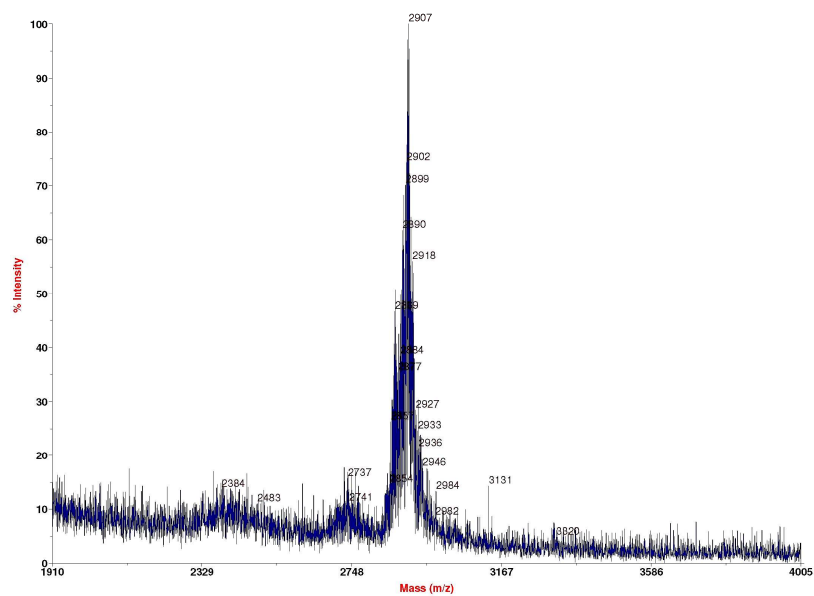

(c)

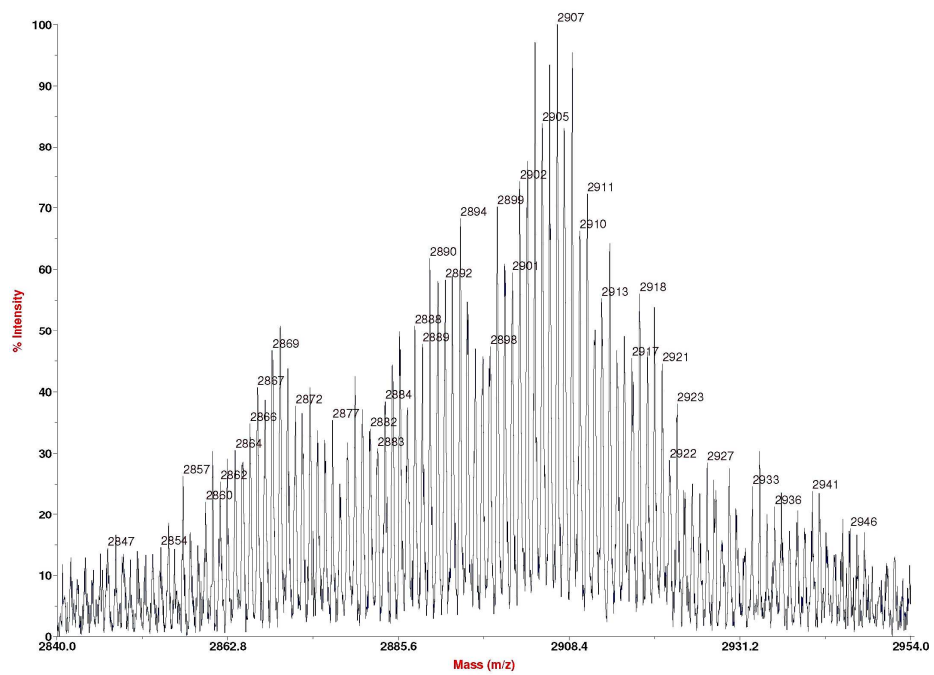

(d)

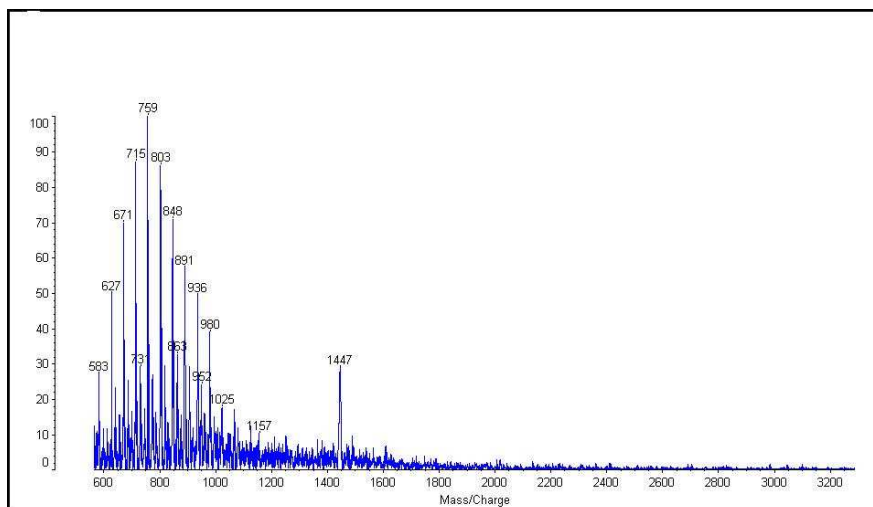

(e)

Figure 2. MALDI-TOF Mass spectra of: (a) DiPEG750, (2,5-Dihydroxybenzoic acid, was used as the matrix); (b) (c) (d)  $Gd_3N@C_{80}[DiPEG750]$ , (9-nitroanthracene was used as the matrix); (e)  $Gd_3N@C_{80}[DiPEG750(OH)_x]$ , (9-nitroanthracene was used as the matrix).
